# Supplementary material for: S-Adenosylhomocysteine Is a Useful Metabolic Factor in the Early Prediction of Septic Disease Progression and Death in Critically Ill Patients: A Prospective Cohort Study
Source: MDPI journal article supplement (doi:10.3390/ijms241612600), 2023-08-09
Supplement: s1 [file s1]

**Table S5: Diagnostic sepsis 1/2-definition criteria for sepsis, severe sepsis and septic shock\*.**

|                                                                                                                            |
|----------------------------------------------------------------------------------------------------------------------------|
| <b>SIRS (≥ 2 of 4 criteria fulfilled)</b>                                                                                  |
| Temperature ≥ 38.0°C or < 35.5°C                                                                                           |
| Heart rate > 90/min or catecholamine requirement ≥ 4h (dose independent)                                                   |
| Respiratory rate > 20/min or p <sub>a</sub> CO <sub>2</sub> < 32mmHg or ventilation/NIV therapy                            |
| leukocytosis > 12.000/μl or leukopenia < 4.000/μl or > 10% immature neutrophils in differentia blood count                 |
| <b>Sepsis (SIRS + infection)</b>                                                                                           |
| confirmed infection                                                                                                        |
| microbiologically confirmed infection                                                                                      |
| urgent suspicion of infection                                                                                              |
| <b>Severe sepsis (Sepsis + organ dysfunction ≥ 2 criteria fulfilled)</b>                                                   |
| Sepsis-induced hypotension (SBP < 90mmHg or MAP < 70mmHg or drop in SBP ≥ 40mmHg from baseline)**                          |
| Lactate ≥ 2 mmol/L**                                                                                                       |
| Urine output < 0,5 mL/kg/h for 6-12h (=KDIGO stadium I)**                                                                  |
| new onset creatinine increase of 1,5-1,9 times from baseline (=KDIGO Stadium I)**                                          |
| acute respiratory failure p <sub>a</sub> O <sub>2</sub> /F <sub>i</sub> O <sub>2</sub> < 250 in the absence of pneumonia   |
| acute respiratory failure p <sub>a</sub> O <sub>2</sub> /F <sub>i</sub> O <sub>2</sub> < 200 in presence of pneumonia      |
| new increase of bilirubin > 2mg/dL                                                                                         |
| new onset of thrombocytopenia < 100.000 μL or platelet transfusion                                                         |
| new onset of coagulopathy (INR > 1,5)                                                                                      |
| septic encephalopathy (confusion, agitation)                                                                               |
| metabolic acidosis (pH < 7,35 und BE < - 4mmol/L)                                                                          |
| septic cardiomyopathy ( HI < 3,0 L/min/m <sup>2</sup> oder dobutamine-/levosimendan-/milrinone therapy (dose independent)) |
| <b>Septic shock</b>                                                                                                        |
| Sepsis-induced hypotension with norepinephrine or epinephrine requirement of ≥ 0,1 μg/kg/min**                             |

\*modified from Surviving Sepsis Campaign 2012 ([39, there Table 2) and 2001 International Sepsis Definitions Conference ([40], there Table 1); The applied criteria have been validated previously [41].

\*\*under adequate volume therapy

39. Dellinger, R. P.; Levy, M. M.; Rhodes, A.; Annane, D.; Gerlach, H.; Opal, S. M.; Sevransky, J. E.; Sprung, C. L.; Douglas, I. S.; Jaeschke, R. Surviving Sepsis Campaign: international guidelines for management of severe sepsis and septic shock, 2012. *Intensive Care Med* **2013**, *39*(2), 165-228. doi: 10.1007/s00134-012-2769-8.
40. Levy, M. M.; Fink, M. P.; Marshall, J. C.; Abraham, E.; Angus, D.; Cook, D.; Cohen, J.; Opal, S. M.; Vincent, J.-L.; Ramsay, G. 2001 sccm/esicm/accp/ats/sis international sepsis definitions conference. *Intensive Care Med* **2003**, *29*(4), 530-538. doi: 10.1007/s00134-003-1662-x.
41. Centner, F. S.; Oster, M. E.; Dally, F. J.; Sauter-Servaes, J.; Pelzer, T.; Schoettler, J. J.; Hahn, B.; Fairley, A. M.; Abdulazim, A.; Hackenberg, K. A. M.; Groden, C.; Etminan, N.; Krebs, J.; Thiel, M.; Wenz, H.; Maros, M. E. Comparative Analyses of the Impact of Different Criteria for Sepsis Diagnosis on Outcome in Patients with Spontaneous Subarachnoid Hemorrhage. *J Clin Med* **2022**, *11*(13), 3873. doi: 10.3390/jcm11133873
