# Supplementary material for: S-Adenosylhomocysteine Is a Useful Metabolic Factor in the Early Prediction of Septic Disease Progression and Death in Critically Ill Patients: A Prospective Cohort Study
Source: MDPI journal article supplement (doi:10.3390/ijms241612600), 2023-08-09
Supplement: s1 [file s1]

Table S1. Baseline and clinical characteristics of the study population represented by variables which in intergroup comparisons were tested non-significant\*.

| All (N=99)                    |                | Groups by sepsis-1/2 definition |               |                                        | Groups by sepsis-3 definition |                |                                      | Groups by survival |                |                         |  |  |  |
|-------------------------------|----------------|---------------------------------|---------------|----------------------------------------|-------------------------------|----------------|--------------------------------------|--------------------|----------------|-------------------------|--|--|--|
|                               |                | G <sub>12</sub> 1 (N=67)        |               | G <sub>12</sub> 2 (N=26)               | G <sub>3</sub> 1 (N=39)       |                | G <sub>3</sub> 2 (N=27)              | Survivor, S (N=75) |                | Non-Survivor, NS (N=24) |  |  |  |
| n                             |                | n                               | n             | G <sub>12</sub> 1 vs G <sub>12</sub> 2 | n                             | n              | G <sub>3</sub> 1 vs G <sub>3</sub> 2 | n                  | n              | S vs NS                 |  |  |  |
| Admitting Department          |                |                                 |               |                                        |                               |                |                                      |                    |                |                         |  |  |  |
| Surgery                       | 39 (39)        | 22 (33)                         | 14 (54)       | ns                                     | 13 (33)                       | 13 (48)        | ns                                   | 27 (36)            | 12 (50)        | ns                      |  |  |  |
| Orthopedics and trauma center | 27 (27)        | 16 (24)                         | 10 (39)       | ns                                     | 8 (21)                        | 11 (41)        | ns                                   | 23 (31)            | 4 (17)         | ns                      |  |  |  |
| Neurosurgery                  | 24 (24)        | 18 (27)                         | 4 (15)        |                                        | 15 (39)                       | 5 (19)         | ns                                   | 17 (23)            | 7 (29)         | ns                      |  |  |  |
| Otorhino-laryngology          | 9 (9)          | 8 (12)                          | 1 (4)         |                                        | 4 (10)                        | 1 (4)          | ns                                   | 8 (11)             | 1 (4)          |                         |  |  |  |
| Others                        | 10 (10)        | 7 (10)                          | 3 (12)        |                                        | 3 (8)                         | 1 (4)          | ns                                   | 8 (11)             | 2 (8)          |                         |  |  |  |
| Chronic conditions            |                |                                 |               |                                        |                               |                |                                      |                    |                |                         |  |  |  |
| Diabetes                      | 18 (18)        | 14 (21)                         | 3 (12)        | ns                                     | 9 (23)                        | 2 (7)          | ns                                   | 15 (20)            | 3 (13)         | ns                      |  |  |  |
| Cardiovascular diseases       | 43 (43)        | 26 (39)                         | 13 (50)       | ns                                     | 17 (44)                       | 10 (37)        | ns                                   | 29 (39)            | 14 (58)        | ns                      |  |  |  |
| Respiratory diseases          | 5 (5)          | 2 (3)                           | 2 (8)         |                                        |                               | 1 (4)          | ns                                   | 2 (3)              | 3 (13)         |                         |  |  |  |
| Alcoholism                    | 6 (6)          | 5 (8)                           | 1 (4)         |                                        | 3 (8)                         | 2 (7)          | ns                                   | 6 (8)              |                |                         |  |  |  |
| Charlson Comorbidity Index    | 99 1 (1-3)     | 67 1 (1-3)                      | 1 (1-3)       | ns                                     | 39 1 (1-3)                    | 27 1 (0-3)     | ns                                   | 1 (1-3)            | 1 (1-4)        | ns                      |  |  |  |
| BGA and electrolytes          |                |                                 |               |                                        |                               |                |                                      |                    |                |                         |  |  |  |
| PO2 [mmHg]                    | 98 89 (77-103) | 66 91 (78-104)                  | 26 81 (78-96) | ns                                     | 38 92 (84-106)                | 27 88 (78-110) | ns                                   | 74 90 (78-103)     | 24 81 (73-108) | ns                      |  |  |  |

|                                    |    |                  |    |                  |    |                  |    |    |                  |    |                  |    |    |                  |    |                  |    |
|------------------------------------|----|------------------|----|------------------|----|------------------|----|----|------------------|----|------------------|----|----|------------------|----|------------------|----|
| PCO2 [mmHg]                        | 98 | 43 (39-47)       | 66 | 43 (39-48)       | 26 | 42 (39-47)       | ns | 38 | 45 (39-48)       | 27 | 44 (42-51)       | ns | 74 | 43 (39-47)       | 24 | 42 (36-48)       | ns |
| ScvO2 [%]                          | 73 | 75 (71-78)       | 43 | 75 (71-79)       | 24 | 73 (68-77)       | ns | 27 | 75 (71-78)       | 22 | 74 (71-79)       | ns | 52 | 75 (70-78)       | 21 | 74 (71-77)       | ns |
| pH                                 | 98 | 7.42 (7.37-7.45) | 66 | 7.42 (7.38-7.45) | 26 | 7.40 (7.35-7.45) | ns | 38 | 7.42 (7.40-7.45) | 27 | 7.39 (7.36-7.42) | ns | 74 | 7.42 (7.38-7.45) | 24 | 7.41 (7.35-7.45) | ns |
| HCO3-stand [mmol/L]                | 98 | 27.5 (25.3-29.7) | 66 | 27.9 (26.1-29.5) | 26 | 27.2 (24.1-30.1) | ns | 38 | 27.5 (26.5-29.9) | 27 | 28.0 (25.4-29.8) | ns | 74 | 28.0 (25.7-29.7) | 24 | 26.4 (22.1-29.3) | ns |
| BEstand [mmol/L]                   | 98 | 3.3 (1.1-5.4)    | 66 | 3.5 (2.0-5.4)    | 26 | 2.5 (-0.4-5.1)   | ns | 38 | 3.3 (2.2-5.5)    | 27 | 3.4 (1.1-4.8)    | ns | 74 | 3.8 (1.8-5.4)    | 24 | 2.2 (-2.2-5.0)   | ns |
| Na+ [mmol/L]                       | 98 | 141 (137-143)    | 66 | 141 (137-143)    | 26 | 141 (137-145)    | ns | 38 | 141 (138-143)    | 27 | 141 (137-143)    | ns | 74 | 141 (137-142)    | 24 | 143 (138-145)    | ns |
| Cl- [mmol/L]                       | 98 | 107 (105-110)    | 66 | 107 (105-109)    | 26 | 109 (106-111)    | ns | 38 | 107 (105-109)    | 27 | 109 (106-111)    | ns | 74 | 107 (105-109)    | 24 | 109 (105-111)    | ns |
| ionized Ca++ [mmol/L]              | 98 | 1.12 (1.07-1.16) | 66 | 1.12 (1.09-1.17) | 26 | 1.10 (1.05-1.13) | ns | 38 | 1.13 (1.10-1.19) | 27 | 1.10 (1.07-1.15) | ns | 74 | 1.12 (1.08-1.16) | 24 | 1.10 (1.07-1.21) | ns |
| SIDa [mmol/L]                      | 97 | 38.3 (35.1-40.0) | 66 | 38.4 (35.7-40.1) | 26 | 37.3 (33.9-39.5) | ns | 38 | 38.4 (35.6-40.1) | 27 | 37.2 (33.9-39.2) | ns | 74 | 37.7 (35.1-39.9) | 23 | 39.0 (34.5-40.0) | ns |
| <b>Clinical chemistry</b>          |    |                  |    |                  |    |                  |    |    |                  |    |                  |    |    |                  |    |                  |    |
| Glucose [mg/dL]                    | 98 | 127 (110-167)    | 66 | 128.5 (114-170)  | 26 | 121 (106-158)    | ns | 38 | 133 (114-175)    | 27 | 129 (110-158)    | ns | 74 | 127.5 (111-167)  | 24 | 125 (107-163)    | ns |
| Bilirubin [mg/dL]                  | 93 | 0.61 (0.35-0.94) | 62 | 0.49 (0.32-0.85) | 25 | 0.81 (0.44-1.19) | ns | 37 | 0.66 (0.32-0.93) | 26 | 0.68 (0.45-0.97) | ns | 71 | 0.61 (0.34-0.97) | 22 | 0.63 (0.41-0.94) | ns |
| AST [U/L]                          | 90 | 43 (27-90)       | 60 | 42 (26-79.5)     | 25 | 65 (31-111)      | ns | 35 | 42 (30-101)      | 26 | 72.5 (31-143)    | ns | 69 | 42 (29-93)       | 21 | 48 (26-78)       | ns |
| ALT [U/L]                          | 92 | 37 (20-85)       | 61 | 36 (19-64)       | 25 | 44 (21-106)      | ns | 36 | 36 (19.5-89)     | 26 | 41 (21-117)      | ns | 70 | 39 (20-88)       | 22 | 28 (20-82)       | ns |
| Lipase [U/L]                       | 90 | 86 (61-207)      | 59 | 87 (56-200)      | 25 | 82 (61-163)      | ns | 36 | 104 (64-224)     | 25 | 76 (51-154)      | ns | 69 | 87 (61-193)      | 21 | 82 (61-357)      | ns |
| PCT [µg/L]                         | 69 | 0.63 (0.20-2.29) | 40 | 0.40 (0.19-1.55) | 23 | 0.99 (0.22-2.38) | ns | 23 | 0.39 (0.19-1.24) | 19 | 0.98 (0.19-1.67) | ns | 52 | 0.59 (0.19-2.13) | 17 | 0.90 (0.32-2.29) | ns |
| <b>Clinical scores at baseline</b> |    |                  |    |                  |    |                  |    |    |                  |    |                  |    |    |                  |    |                  |    |
| Hb [g/dL]                          | 98 | 8.9 (8.1-10.1)   | 66 | 8.8 (8.1-10)     | 26 | 8.9 (8.1-10)     | ns | 38 | 8.6 (8.1-9.2)    | 27 | 8.9 (7.9-10)     | ns | 74 | 8.9 (7.9-10.1)   | 24 | 8.9 (8.4-9.7)    | ns |
| WBC [10E9/L]                       | 96 | 11.5 (8.3-14.3)  | 64 | 11.1 (8.9-13.6)  | 26 | 11.4 (6.7-15.4)  | ns | 38 | 11.9 (9.1-14.1)  | 27 | 10.6 (6.7-13.0)  | ns | 72 | 11.9 (9.0-14.3)  | 24 | 10.4 (5.9-14.3)  | ns |
| INR                                | 96 | 1.07 (1.00-1.12) | 64 | 1.06 (1.00-1.12) | 26 | 1.07 (1.00-1.12) | ns | 38 | 1.07 (1.01-1.11) | 27 | 1.02 (0.99-1.12) | ns | 72 | 1.06 (1.00-1.11) | 24 | 1.10 (1.00-1.19) | ns |
| Thrombocytes [10E9/L]              | 96 | 162 (106-250)    | 64 | 157 (110-232)    | 26 | 175 (105-252)    | ns | 38 | 139 (95-201)     | 27 | 142 (104-213)    | ns | 72 | 166 (114-256)    | 24 | 137 (95-245)     | ns |
| Basophils [%]                      | 72 | 0.2 (0.1-0.3)    | 49 | 0.2 (0.1-0.2)    | 17 | 0.2 (0.1-0.3)    | ns | 31 | 0.2 (0.1-0.2)    | 20 | 0.2 (0.1-0.3)    | ns | 55 | 0.2 (0.1-0.3)    | 17 | 0.2 (0.1-0.3)    | ns |
| Eosinophils [%]                    | 72 | 0.3 (0.1-0.9)    | 49 | 0.3 (0.1-0.8)    | 17 | 0.5 (0.0-1.4)    | ns | 31 | 0.1 (0.0-0.6)    | 20 | 0.5 (0.1-1.2)    | ns | 55 | 0.3 (0.1-1.0)    | 17 | 0.2 (0.0-0.6)    | ns |

|                           |    |                  |    |                  |    |                  |    |    |                  |    |                  |    |    |                  |    |                  |    |
|---------------------------|----|------------------|----|------------------|----|------------------|----|----|------------------|----|------------------|----|----|------------------|----|------------------|----|
| Neutrophils [%]           | 72 | 82.9 (77.9-87.4) | 49 | 83.7 (77.9-87.7) | 17 | 82.7 (78.0-85.8) | ns | 31 | 83.8 (75.9-87.2) | 20 | 81.1 (76.0-83.8) | ns | 55 | 83.0 (77.8-87.5) | 17 | 82.7 (79.9-86.2) | ns |
| Lymphocytes [%]           | 72 | 7.9 (5.4-11.5)   | 49 | 7.4 (5.5-11.9)   | 17 | 9 (6.3-10.9)     | ns | 31 | 9.2 (6.0-12.4)   | 20 | 9.8 (6.8-13.6)   | ns | 55 | 9.0 (5.5-11.6)   | 17 | 7.6 (4.7-11.4)   | ns |
| Monocytes [%]             | 72 | 7.3 (5.8-10.1)   | 49 | 7.2 (5.2-10.5)   | 17 | 7.5 (6.5-9.4)    | ns | 31 | 7.0 (5.2-11.4)   | 20 | 7.6 (6.3-9.9)    | ns | 55 | 7.2 (5.7-10.1)   | 17 | 7.3 (6.5-10.0)   | ns |
| <b>Vital signs</b>        |    |                  |    |                  |    |                  |    |    |                  |    |                  |    |    |                  |    |                  |    |
| Heart rate [1/min]        | 98 | 90 (75-101)      | 66 | 86 (74-99)       | 26 | 93 (79-110)      | ns | 38 | 88 (77-97)       | 27 | 99 (75-113)      | ns | 74 | 90 (77-99)       | 24 | 83 (70-108)      | ns |
| Syst BP [mmHg]            | 98 | 123 (109-134)    | 66 | 124 (111-138)    | 26 | 119 (107-131)    | ns | 38 | 124 (109-140)    | 27 | 116 (106-129)    | ns | 74 | 124 (113-135)    | 24 | 119 (106-132)    | ns |
| Diast BP [mmHg]           | 98 | 59 (53-68)       | 66 | 61 (53-68)       | 26 | 57 (54-66)       | ns | 38 | 61 (52-68)       | 27 | 60 (56-71)       | ns | 74 | 60 (53-68)       | 24 | 57 (51-66)       | ns |
| MAP [mmHg]                | 98 | 80 (72-90)       | 66 | 82 (75-93)       | 26 | 77 (73-87)       | ns | 38 | 82 (75-95)       | 27 | 81 (71-90)       | ns | 74 | 82 (73-91)       | 24 | 76 (68-86)       | ns |
| <b>Supportive Therapy</b> |    |                  |    |                  |    |                  |    |    |                  |    |                  |    |    |                  |    |                  |    |
| Mechanical ventilation    |    | 86 (87)          |    | 57 (85)          |    | 23 (89)          | ns |    | 34 (87)          |    | 26 (96)          | ns |    | 64 (85)          |    | 22 (92)          | ns |
| FiO2                      | 92 | 0.30 (0.30-0.40) | 61 | 0.30 (0.30-0.35) | 25 | 0.35 (0.30-0.40) | ns | 37 | 0.30 (0.30-0.35) | 27 | 0.30 (0.30-0.40) | ns | 69 | 0.30 (0.30-0.35) | 23 | 0.35 (0.30-0.5)  | ns |
| Volume balance [ml]       | 98 | 15 (-64-79)      | 66 | 14 (-78-73)      | 26 | 19 (-47-82)      | ns | 38 | 20 (-64-86)      | 27 | 11 (-25-64)      | ns | 74 | 14 (-64-82)      | 24 | 18 (-82-70)      | ns |
| <b>Clinical Scores</b>    |    |                  |    |                  |    |                  |    |    |                  |    |                  |    |    |                  |    |                  |    |
| RASS**                    | 97 | -3 (-5-0)        | 65 | -3 (-5-0)        | 26 | -4 (-5-0)        | ns | 38 | -3 (-5-0)        | 27 | -4 (-5--3)       | ns | 74 | -3 (-5--1)       | 23 | -1 (-5-0)        | ns |
| TISS                      | 98 | 18 (10-22)       | 66 | 15 (10-22)       | 26 | 18 (13-23)       | ns | 38 | 18 (10-22)       | 27 | 22 (15-23)       | ns | 74 | 18 (10-22)       | 24 | 22 (11.5-25)     | ns |

\*Sepsis-1/2 defined patient groups G<sub>12</sub>1 and G<sub>12</sub>2 designate patients without and with progression from SIRS or sepsis to severe sepsis or septic shock (development of septic organ dysfunction). Sepsis-3 defined groups G<sub>3</sub>1 and G<sub>3</sub>2 designate patients who remain sepsis free or progress to sepsis (development of septic organ dysfunction). Results displayed as median (interquartile range, IQR) or number (%); \*\* °-mode for RASS calculation; Abbreviations: N=number of patients included; n=number of determinations for respective variable; ns=not significant; PO<sub>2</sub>=partial pressure of oxygen; PCO<sub>2</sub>=partial pressure of carbon dioxide; ScvO<sub>2</sub>=central venous oxygen saturation; HCO<sub>3</sub>-stand=standard bicarbonate; BEstand=standard base excess; Na+=sodium; Cl-=chloride; Ca++=calcium; SIDa=strong ion difference apparent; AST=aspartate aminotransaminase; ALT=alanine aminotransaminase; PCT=procalcitonin; Hb=hemoglobin; WBC=white blood cell count; INR=international normalized ratio; Syst=systolic; BP=blood pressure; Diast=diastolic; MAP=mean arterial pressure; FiO<sub>2</sub>=fraction of inspired oxygen; RASS=Richmond agitation sedation scale; TISS=therapeutic intervention score scale.
