# Supplementary material for: S-Adenosylhomocysteine Is a Useful Metabolic Factor in the Early Prediction of Septic Disease Progression and Death in Critically Ill Patients: A Prospective Cohort Study
Source: MDPI journal article supplement (doi:10.3390/ijms241612600), 2023-08-09
Supplement: s1 [file s1]

**Table S2. Univariate analysis for prediction of progression of disease for variables which were tested non-significant \*.**

| Sepsis-1/2 definition              |         | Sepsis-3 definition               |         |
|------------------------------------|---------|-----------------------------------|---------|
| Variable                           | p-value | Variable                          | p-value |
| Heart rate [1/min]                 | 0.054   | Heart rate [1/min]                | 0.062   |
| Ionized Calcium++<br>[mmol/L]      | 0.056   | Ionized Calcium++<br>[mmol/L]     | 0.074   |
| AST [U/L]                          | 0.063   | RASS                              | 0.078   |
| Volume balance [mL]                | 0.070   | Horovitz Index<br>[mmHg]          | 0.090   |
| TISS                               | 0.075   | Systolic blood<br>pressure [mmHg] | 0.110   |
| Lactate [mmol/L]                   | 0.092   | Diabetes                          | 0.110   |
| Bilirubin [mg/dL]                  | 0.105   | TISS                              | 0.146   |
| ScvO2 [%]                          | 0.105   | SpO2 [%]                          | 0.151   |
| Mean arterial pressure<br>[mmHg]   | 0.150   | Creatinine [mg/dL]                | 0.168   |
| Acidosis (pH<7.35)                 | 0.156   | Mean arterial pressure<br>[mmHg]  | 0.194   |
| Creatinine [mg/dL]                 | 0.168   | BEstand [mmol/L]                  | 0.203   |
| PO2 [mmHg]                         | 0.181   | AST [U/L]                         | 0.240   |
| BEstand [mmol/L]                   | 0.182   | SIDa [mmol/L]                     | 0.248   |
| HCO3stand [mmol/L]                 | 0.201   | Glucose [mg/dL]                   | 0.277   |
| Systolic blood<br>pressure [mmHg]  | 0.211   | HCO3stand [mmol/L]                | 0.279   |
| Basophils [%]                      | 0.238   | Urea [mg/dL]                      | 0.294   |
| Respiratory rate<br>[1/min]        | 0.240   | K+ [mmol/L]                       | 0.295   |
| ALT [U/L]                          | 0.257   | Hb [g/dL]                         | 0.298   |
| Diabetes                           | 0.302   | Lymphocytes [%]                   | 0.318   |
| SIDa [mmol/L]                      | 0.312   | SAH [nmol/l]                      | 0.324   |
| Cardiovascular<br>diseases         | 0.328   | Mechanical ventilation            | 0.330   |
| Respiratory diseases               | 0.333   | Basophils [%]                     | 0.333   |
| Age [yrs]                          | 0.351   | Volume balance [mL]               | 0.336   |
| Glucose [mg/dL]                    | 0.383   | Charlson Comorbidity<br>Index     | 0.349   |
| Chloride- [mmol/L]                 | 0.418   | PO2 [mmHg]                        | 0.362   |
| SpO2 [%]                           | 0.423   | SAPS II                           | 0.373   |
| INR                                | 0.467   | WBC [10E9/L]                      | 0.373   |
| Diastolic blood<br>pressure [mmHg] | 0.478   | Bilirubin [mg/dL]                 | 0.414   |
| Lipase [U/L]                       | 0.525   | Neutrophils [%]                   | 0.455   |
| Alcoholism                         | 0.532   | Sodium+ [mmol/L]                  | 0.480   |
| Alkalosis (pH>7.45)                | 0.561   | Lactate [mmol/L]                  | 0.512   |

|                            |       |                                 |       |
|----------------------------|-------|---------------------------------|-------|
| Charlson Comorbidity Index | 0.567 | SAM [nmol/l]                    | 0.518 |
| FiO2                       | 0.595 | Acidosis (pH<7.35)              | 0.520 |
| Gender                     | 0.646 | PCO2 [mmHg]                     | 0.585 |
| Hb [g/dL]                  | 0.683 | Cardiovascular diseases         | 0.595 |
| Eosinophils [%]            | 0.709 | ALT [U/L]                       | 0.704 |
| Sodium+ [mmol/L]           | 0.763 | Alkalosis (pH>7.45)             | 0.710 |
| PCT [µg/L]                 | 0.772 | MTA [nmol/l]                    | 0.757 |
| WBC [10E9/L]               | 0.780 | ScvO2 [%]                       | 0.779 |
| Mechanical ventilation     | 0.788 | PCT [µg/L]                      | 0.825 |
| SAM [nmol/l]               | 0.834 | Age [yrs]                       | 0.854 |
| RASS                       | 0.849 | Chloride- [mmol/l]              | 0.897 |
| Thrombocytes [10E9/L]      | 0.861 | INR                             | 0.912 |
| PCO2 [mmHg]                | 0.899 | Diastolic blood pressure [mmHg] | 0.921 |
| Monocytes [%]              | 0.926 | Lipase [U/L]                    | 0.924 |
| Neutrophils [%]            | 0.946 | Thrombocytes [10E9/L]           | 0.939 |
| MTA [nmol/l]               | 0.966 | Monocytes [%]                   | 0.963 |
| Lymphocytes [%]            | 0.979 | Alcoholism                      | 0.966 |
|                            |       | Respiratory diseases            | 0.986 |
|                            |       | Eosinophils [%]                 | 0.987 |
|                            |       | FiO2                            | 0.991 |

\*List of non-significant p-values in univariate testing for prediction of progression of disease in descending order; Abbreviations: AST=aspartate aminotransaminase; TISS=therapeutic intervention score scale; ScvO2=central venous oxygen saturation; PO2=partial pressure of oxygen; BEstand=standard base excess; HCO3-stand=standard bicarbonate; ALT=alanine aminotransaminase; SIDA=strong ion difference apparent; SpO2=peripheral capillary oxygen saturation; INR=international normalized ratio; FiO2=fraction of inspired oxygen; Hb=hemoglobin; PCT=procalcitonin; WBC=white blood cell count; SAM=S-adenosylmethionine; RASS=Richmond agitation sedation scale; PCO2=partial pressure of carbon dioxide; MTA=methylthioadenosine.
