# Supplementary material for: S-Adenosylhomocysteine Is a Useful Metabolic Factor in the Early Prediction of Septic Disease Progression and Death in Critically Ill Patients: A Prospective Cohort Study
Source: MDPI journal article supplement (doi:10.3390/ijms241612600), 2023-08-09
Supplement: s1 [file s1]

**Table S4.** Pre-analysis: Association of patients with versus without final study inclusion criteria with subsequent onset of severe sepsis and/or septic shock.

|                                    | <b>Development of<br/>severe sepsis and/or septic<br/>shock</b> | <b>No development of<br/>severe sepsis and/or septic<br/>shock</b> | <b>Marginal Row<br/>Totals</b> |
|------------------------------------|-----------------------------------------------------------------|--------------------------------------------------------------------|--------------------------------|
| <b>SIRS or sepsis</b>              | 19                                                              | 58                                                                 | 77                             |
| <b>neither SIRS nor<br/>sepsis</b> | 6                                                               | 98                                                                 | 104                            |
| <b>marginal column<br/>totals</b>  | 25                                                              | 156                                                                | 181                            |

\*From May 2016 to December 2016 a total of 413 patients were rated daily by a senior intensivist according to sepsis-1/2 defined criteria to suffer from neither SIRS nor sepsis, SIRS, sepsis, severe sepsis, or septic shock. A chi-square test of independence was performed to examine the relation between the presence of SIRS or sepsis for two consecutive days and 24 hours, respectively upon ICU admission (=final study inclusion criteria) and subsequent development of severe sepsis and/or septic shock within the next five days. The relation was significant,  $X^2 = 13.28$   $p < 0.001$ . Following admission to the ICU, critically ill patients diagnosed with SIRS or sepsis for two consecutive days or 24 hours, respectively were more likely to develop severe sepsis and/or septic shock within the following five days than those without. In this pre-analysis 232 patients of the daily rated 413 patients were not included for the following reasons: duration of SIRS less than 48 hours, stay on ICU less than 5 days, initial presentation with severe sepsis or septic shock, no information available from the questionnaire or lack of the questionnaire.
