# Supplementary material for: S-Adenosylhomocysteine Is a Useful Metabolic Factor in the Early Prediction of Septic Disease Progression and Death in Critically Ill Patients: A Prospective Cohort Study
Source: MDPI journal article supplement (doi:10.3390/ijms241612600), 2023-08-09
Supplement: s1 [file s1]

**Table S3. Univariate analysis for prediction of death for variables which were tested non-significant.\***

| Variable                        | Death | p-value |
|---------------------------------|-------|---------|
| Horovitz Index [mmHg]           |       | 0.053   |
| Lactate [mmol/L]                |       | 0.066   |
| TISS                            |       | 0.066   |
| SpO2 [%]                        |       | 0.071   |
| Respiratory diseases            |       | 0.081   |
| Cardiovascular diseases         |       | 0.094   |
| Pressor therapy                 |       | 0.096   |
| Gender                          |       | 0.116   |
| Respiratory rate [1/min]        |       | 0.152   |
| Diastolic blood pressure [mmHg] |       | 0.163   |
| Chloride- [mmol/L]              |       | 0.167   |
| PCO2 [mmHg]                     |       | 0.172   |
| Sodium+ [mmol/L]                |       | 0.173   |
| MTA [nmol/l]                    |       | 0.174   |
| Mean arterial pressure [mmHg]   |       | 0.190   |
| Volume balance [mL]             |       | 0.190   |
| RASS                            |       | 0.239   |
| Charlson Comorbidity Index      |       | 0.253   |
| SAM [nmol/l]                    |       | 0.270   |
| FiO2                            |       | 0.271   |
| Eosinophils [%]                 |       | 0.333   |
| WBC [10E9/L]                    |       | 0.347   |
| Systolic blood pressure [mmHg]  |       | 0.375   |
| ScvO2 [%]                       |       | 0.391   |
| Diabetes                        |       | 0.411   |
| Ionized Calcium++ [mmol/L]      |       | 0.419   |
| Shock index                     |       | 0.431   |
| Alkalosis (pH>7.45)             |       | 0.472   |
| CRP [mg/L]                      |       | 0.494   |
| PCT [µg/L]                      |       | 0.497   |
| Mechanical ventilation (y)      |       | 0.505   |
| Basophils [%]                   |       | 0.525   |
| INR                             |       | 0.545   |
| Glucose [mg/dL]                 |       | 0.611   |
| SIDa [mmol/L]                   |       | 0.628   |
| Bilirubin [mg/dL]               |       | 0.670   |
| PO2 [mmHg]                      |       | 0.762   |
| Heart rate [1/min]              |       | 0.829   |
| AST [U/L]                       |       | 0.830   |
| ALT [U/L]                       |       | 0.835   |
| Thrombocytes [10E9/L]           |       | 0.852   |
| Neutrophils [%]                 |       | 0.874   |

|                  |       |
|------------------|-------|
| Lipase [U/L]     | 0.880 |
| Hb [g/dL]        | 0.899 |
| Monocytes [%]    | 0.972 |
| Alcoholism       | 0.973 |
| Temperature [°C] | 0.993 |
| Lymphocytes [%]  | 1.000 |

\*List of non-significant p-values in univariate testing for mortality prediction in descending order; Abbreviations: TISS=therapeutic intervention score scale; SpO2=peripheral capillary oxygen saturation; PCO2=partial pressure of carbon dioxide; MTA=methylthioadenosine; RASS=Richmond agitation sedation scale; SAM=S-adenosylmethionine; FiO2=fraction of inspired oxygen; WBC=white blood cell count; ScvO2=central venous oxygen saturation; CRP=c-reactive protein; PCT=procalcitonin; INR=international normalized ratio; SIDA=strong ion difference apparent; PO2=partial pressure of oxygen; AST=aspartate aminotransaminase; ALT=alanine aminotransaminase; Hb=hemoglobin.
