# Supplementary material for: S-Adenosylhomocysteine Is a Useful Metabolic Factor in the Early Prediction of Septic Disease Progression and Death in Critically Ill Patients: A Prospective Cohort Study
Source: MDPI journal article supplement (doi:10.3390/ijms241612600), 2023-08-09
Supplement: s1 [file s1]

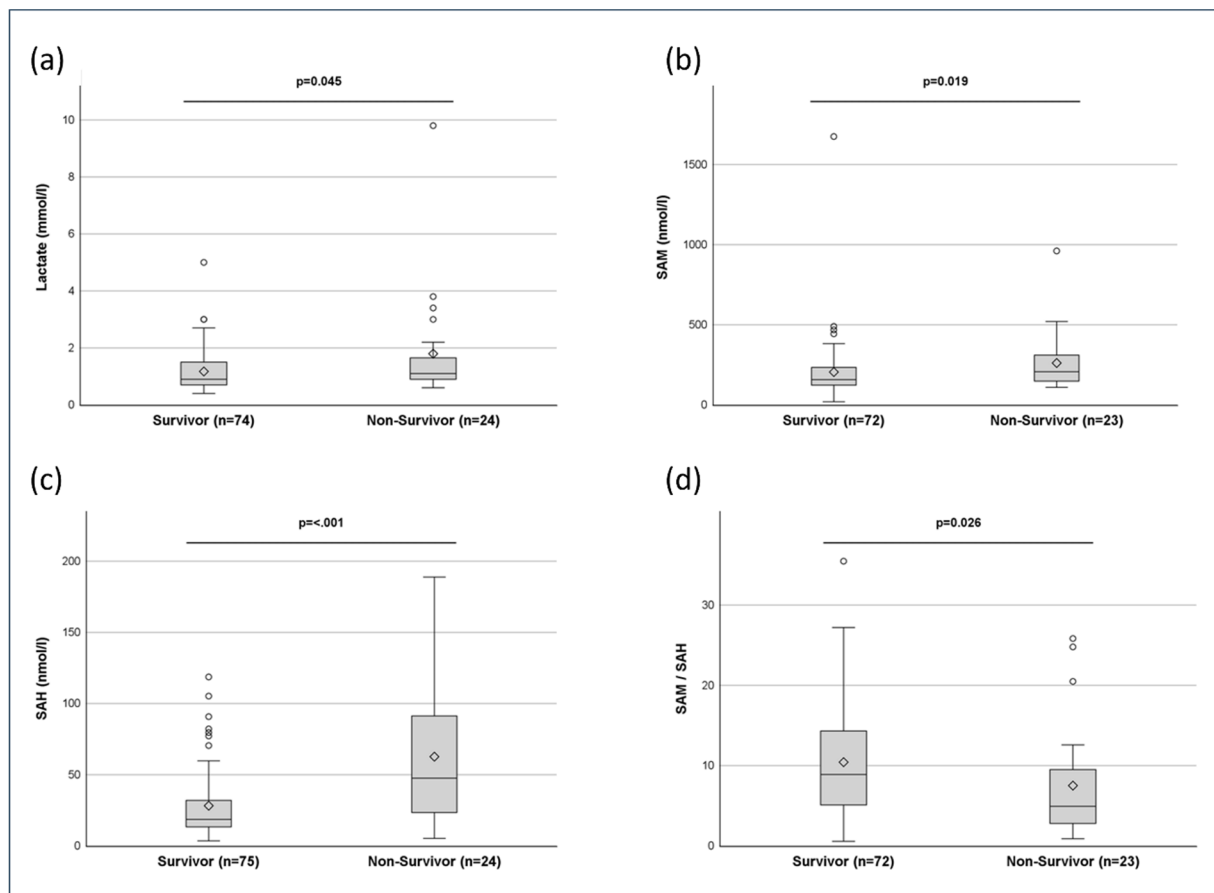

**Supplementary Figure S1.** Plasma concentrations of lactate (a), S-adenosylmethionine (SAM, (b)), S-adenosylhomocysteine (SAH, (c)), and ratio of SAM to SAH (d) in survivors and non-survivors at baseline. Data are represented by box plots, with upper and lower line of the box representing the 25<sup>th</sup> and 75<sup>th</sup> percentile, the horizontal line and the diamond in the box show the median and mean value, respectively. SAM-to-SA-H ratio was calculated by division of SAM by SAH values. n gives the number of patients measured. Data of groups were compared by Mann-Whitney U test.
